# Supplementary material for: Unique porous microspheres with dense core and a porous layer prepared by a novel S/O/W emulsion technique
Source: Royal Society of Chemistry journal article supplement (doi:10.1039/b907786c), 2009-01-01
Supplement: b907786c.pdf [file b907786c.pdf]

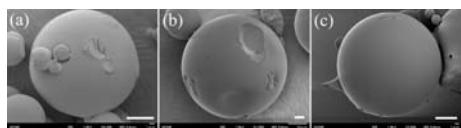

Fig. S1: SEM surface observations of microspheres prepared under the following different conditions: (a) without HAp and NaCl, (b) without HAp but with NaCl, and (c) with HAp but without NaCl”.
